# Supplementary material
Source: PubMed Central journal article supplement (PMC3093678)
Supplement: bjp.bp.110.082172_1.pdf [file bjp.bp.110.082172_1.pdf]

**Table DS1** Means and standard deviations (median and interquartile range (IQR)) by centre and treatment

|                                           | Low-risk strata (n=143) |       |       |                      |       |        | High-risk strata (n=50) |        |        |                     |        |        | Total       |        |        |                      |        |        | Effect sizes <sup>b</sup> |      |     |           |      |      |  |
|-------------------------------------------|-------------------------|-------|-------|----------------------|-------|--------|-------------------------|--------|--------|---------------------|--------|--------|-------------|--------|--------|----------------------|--------|--------|---------------------------|------|-----|-----------|------|------|--|
|                                           | CBT (n=121)             |       |       | Stepped care (n=122) |       |        | CBT (n=26)              |        |        | Stepped care (n=24) |        |        | CBT (n=147) |        |        | Stepped care (n=146) |        |        | Post-test                 |      |     | Follow-up |      |      |  |
|                                           | BL                      | PT    | FU    | BL                   | PT    | FU     | BL                      | PT     | FU     | BL                  | PT     | FU     | BL          | PT     | FU     | BL                   | PT     | FU     | b                         | AUC  | NNT | b         | AUC  | NNT  |  |
| EDE                                       |                         |       |       |                      |       |        |                         |        |        |                     |        |        |             |        |        |                      |        |        |                           |      |     |           |      |      |  |
| Objective binges, <sup>a,g</sup>          | 25                      | 3     | 7     | 26                   | 8     | 3      | 32                      | 10     | 20     | 30                  | 8      | 5      | 27          | 4      | 10     | 27                   | 8      | 3      | 0.16                      | 0.55 | 11  | -0.14     | 0.46 | -13  |  |
| median (IQR)                              | (22)                    | (20)  | (22)  | (25)                 | (23)  | (22)   | (24)                    | (28)   | (44)   | (15)                | (25)   | (24)   | (25)        | (21)   | (25)   | (24)                 | (24)   | (22)   |                           |      |     |           |      |      |  |
| Compensatory behaviours, <sup>a,d,g</sup> | 42                      | 12    | 15    | 40                   | 20    | 5      | 58                      | 14     | 20     | 60                  | 16     | 14     | 44          | 12     | 15     | 43                   | 19     | 5      | 0.09                      | 0.53 | 19  | -0.21     | 0.44 | -8   |  |
| median (IQR)                              | (36)                    | (37)  | (39)  | (38)                 | (34)  | (30)   | (59)                    | (42)   | (66)   | (58)                | (37)   | (33)   | (38)        | (39)   | (43)   | (42)                 | (34)   | (29)   |                           |      |     |           |      |      |  |
| Restraint, <sup>d</sup>                   | 2.9                     | 1.6   | 1.7   | 3.0                  | 2.1   | 1.6    | 3.9                     | 2.9    | 2.9    | 3.9                 | 2.6    | 2.4    | 3.0         | 1.9    | 1.9    | 3.2                  | 2.1    | 1.8    | 0.17                      | 0.55 | 11  | -0.08     | 0.48 | -23  |  |
| mean (s.d.)                               | (1.4)                   | (1.5) | (1.5) | (1.4)                | (1.5) | (1.5)  | (1.2)                   | (1.9)  | (1.7)  | (1.0)               | (1.9)  | (1.6)  | (1.4)       | (1.6)  | (1.6)  | (1.4)                | (1.6)  | (1.6)  |                           |      |     |           |      |      |  |
| Shape concerns,                           | 3.3                     | 2.2   | 2.4   | 3.2                  | 2.6   | 2.3    | 5.2                     | 3.5    | 4.0    | 5.3                 | 3.5    | 3.6    | 3.6         | 2.5    | 2.7    | 3.6                  | 2.7    | 2.5    | 0.18                      | 0.55 | 10  | -0.14     | 0.46 | -13  |  |
| mean (s.d.)                               | (1.2)                   | (1.5) | (1.4) | (1.4)                | (1.5) | (1.5)  | (0.3)                   | (1.9)  | (1.7)  | (0.4)               | (1.6)  | (1.7)  | (1.4)       | (1.6)  | (1.6)  | (1.5)                | (1.6)  | (1.6)  |                           |      |     |           |      |      |  |
| Weight concerns,                          | 3.2                     | 2.2   | 2.1   | 3.2                  | 2.7   | 2.1    | 4.7                     | 3.4    | 3.4    | 4.8                 | 3.5    | 3.0    | 3.5         | 2.4    | 2.4    | 3.5                  | 2.8    | 2.3    | 0.26                      | 0.57 | 7   | -0.06     | 0.48 | 0.27 |  |
| mean (s.d.)                               | (1.4)                   | (1.5) | (1.4) | (1.5)                | (1.5) | (1.5)  | (0.8)                   | (1.6)  | (1.6)  | (0.8)               | (1.4)  | (1.5)  | (1.4)       | (1.6)  | (1.5)  | (1.5)                | (1.5)  | (1.5)  |                           |      |     |           |      |      |  |
| Eating concerns                           | 2.2                     | 1.0   | 1.0   | 2.2                  | 1.3   | 1.0    | 3.3                     | 1.9    | 1.9    | 4.0                 | 2.1    | 1.9    | 3.6         | 1.2    | 1.2    | 2.4                  | 1.4    | 1.2    | 0.17                      | 0.55 | 11  | -0.01     | 0.50 | -254 |  |
| mean (s.d.)                               | (1.3)                   | (1.3) | (1.2) | (1.5)                | (1.2) | (1.3)  | (1.7)                   | (1.8)  | (2.0)  | (1.1)               | (1.7)  | (1.9)  | (1.5)       | (1.4)  | (1.4)  | (1.4)                | (1.4)  | (1.4)  |                           |      |     |           |      |      |  |
| Global, <sup>d</sup> mean (s.d.)          | 2.9                     | 1.8   | 1.8   | 2.9                  | 2.2   | 1.8    | 4.3                     | 2.9    | 3.0    | 4.5                 | 2.9    | 2.7    | 3.1         | 2.0    | 2.0    | 3.2                  | 2.1    | 1.9    | 0.07                      | 0.52 | 24  | -0.06     | 0.48 | -30  |  |
| mean (s.d.)                               | (1.1)                   | (1.2) | (1.2) | (1.2)                | (1.2) | (1.3)  | (0.8)                   | (1.6)  | (1.5)  | (0.5)               | (1.4)  | (1.5)  | (1.1)       | (1.4)  | (1.9)  | (1.2)                | (1.3)  | (1.4)  |                           |      |     |           |      |      |  |
| BMI, mean (s.d.)                          | 22.7                    | 22.7  | 2.9   | 23.6                 | 23.7  | 23.7   | 25.9                    | 26.0   | 26.0   | 22.8                | 22.9   | 23.4   | 23.3        | 23.3   | 23.4   | 23.5                 | 23.6   | 23.6   | -0.06                     | 0.48 | -32 | 0.04      | 0.51 | 48   |  |
| mean (s.d.)                               | (4.1)                   | (4.2) | (4.6) | (5.7)                | (5.8) | (6.2)  | (5.0)                   | (5.1)  | (5.8)  | (2.5)               | (2.9)  | (3.0)  | (4.5)       | (4.5)  | (5.0)  | (5.3)                | (5.4)  | (5.8)  |                           |      |     |           |      |      |  |
| BDI, <sup>d,f,g,i</sup> mean (s.d.)       | 15.8                    | 10.8  | 11.4  | 15.4                 | 11.9  | 11.1   | 27.5                    | 19.1   | 22.4   | 28.1                | 17.2   | 17.2   | 17.9        | 12.3   | 13.3   | 17.5                 | 12.7   | 12.1   | -0.04                     | 0.49 | -41 | -0.11     | 0.47 | -15  |  |
| mean (s.d.)                               | (8.6)                   | (9.1) | (9.4) | (9.1)                | (9.3) | (10.1) | (7.5)                   | (12.9) | (11.3) | (9.1)               | (14.0) | (14.3) | (9.5)       | (10.3) | (10.6) | (10.3)               | (10.4) | (11.1) |                           |      |     |           |      |      |  |
| TFEQ, <sup>28</sup> mean (s.d.)           |                         |       |       |                      |       |        |                         |        |        |                     |        |        |             |        |        |                      |        |        |                           |      |     |           |      |      |  |
| Restraint                                 | 13.2                    | 12.1  | 12.2  | 13.2                 | 12.6  | 11.8   | 12.7                    | 12.7   | 13.0   | 13.5                | 13.4   | 12.6   | 13.1        | 12.2   | 12.3   | 13.2                 | 12.8   | 11.9   | -0.11                     | 0.47 | -16 | -0.09     | 0.48 | -20  |  |
| Disinhibition <sup>c</sup>                | 12.7                    | 9.9   | 10.6  | 12.6                 | 11.0  | 10.0   | 14.3                    | 12.4   | 13.2   | 13.7                | 11.0   | 10.6   | 12.9        | 10.3   | 11.1   | 12.7                 | 11.0   | 10.1   | -0.19                     | 0.45 | -9  | -0.24     | 0.43 | -7   |  |
| Hunger                                    | 8.4                     | 7.1   | 6.8   | 8.4                  | 7.2   | 6.5    | 9.1                     | 7.4    | 8.1    | 9.2                 | 7.7    | 7.4    | 8.5         | 7.1    | 7.0    | 8.5                  | 7.3    | 6.6    | -0.03                     | 0.49 | -52 | -0.10     | 0.47 | -19  |  |
| mean (s.d.)                               | (3.6)                   | (3.7) | (3.8) | (3.9)                | (4.0) | (4.3)  | (3.5)                   | (3.8)  | (3.9)  | (3.6)               | (3.7)  | (4.4)  | (3.6)       | (3.7)  | (3.8)  | (3.9)                | (3.9)  | (4.3)  |                           |      |     |           |      |      |  |
| YBC-EDS, mean (s.d.)                      |                         |       |       |                      |       |        |                         |        |        |                     |        |        |             |        |        |                      |        |        |                           |      |     |           |      |      |  |
| Preoccupation                             | 9.1                     | 6.0   | 5.7   | 9.3                  | 7.2   | 5.5    | 11.7                    | 7.7    | 8.3    | 12.1                | 8.1    | 7.4    | 9.6         | 6.3    | 6.2    | 9.8                  | 7.3    | 5.8    | -0.24                     | 0.43 | -7  | -0.08     | 0.48 | -21  |  |
| Ritual, <sup>e</sup>                      | 8.3                     | 5.0   | 4.8   | 8.8                  | 6.0   | 4.7    | 10.8                    | 6.8    | 7.0    | 10.6                | 7.0    | 5.5    | 8.8         | 5.4    | 5.2    | 9.1                  | 6.2    | 4.8    | -0.18                     | 0.45 | -10 | -0.07     | 0.48 | -24  |  |
| mean (s.d.)                               | (3.0)                   | (4.0) | (4.0) | (3.0)                | (4.0) | (4.4)  | (1.7)                   | (4.7)  | (4.3)  | (2.0)               | (4.5)  | (5.1)  | (3.0)       | (4.2)  | (4.2)  | (3.1)                | (4.1)  | (4.5)  |                           |      |     |           |      |      |  |
| mean (s.d.)                               | (3.5)                   | (4.5) | (4.5) | (3.6)                | (4.4) | (4.7)  | (2.6)                   | (4.7)  | (5.1)  | (3.1)               | (5.2)  | (5.6)  | (3.5)       | (4.5)  | (4.6)  | (3.6)                | (4.6)  | (4.8)  |                           |      |     |           |      |      |  |
| Abstinence, <sup>d</sup> %                | 0                       | 17    | 17    | 0                    | 8     | 26     | 0                       | 4      | 19     | 0                   | 25     | 25     | 0           | 15     | 18     | 0                    | 11     | 26     |                           | 0.52 | 25  |           | 0.46 | -13  |  |
| Remission, %                              | 0                       | 60    | 45    | 0                    | 52    | 30     | 0                       | 42     | 38     | 0                   | 54     | 46     | 0           | 57     | 44     | 0                    | 52     | 32     |                           | 0.52 | 20  |           | 0.56 | -8   |  |

CBT, cognitive-behavioural therapy; BL, baseline; PT, post-treatment; FU, follow-up; AUC, area under the curve; NNT, number needed to treat; EDE, Eating Disorder Examination; BDI, Beck Depression Inventory; YBC-EDS, Yale-Brown-Cornell Eating Disorders Scale; TFEQ, three-factor eating questionnaire.

a. Square root used in analysis.

b. Positive effect size favours CBT.

c. Statistically significant differences ( $P < 0.05$ ) between treatments at post-test.

d. Statistically significant differences ( $P < 0.05$ ) between treatments in the risk strata at post-test.

e. Statistically significant differences ( $P < 0.05$ ) between treatments in the sites at post-test.

f. Statistically significant differences ( $P < 0.01$ ) between treatments in the sites at post-test.

g. Statistically significant differences ( $P < 0.05$ ) between treatments at follow-up.

h. Statistically significant differences ( $P < 0.01$ ) between treatments at follow-up.

i. Statistically significant differences ( $P < 0.01$ ) between treatments in the risk strata at follow-up.
